# Supplementary material for: Heterochromatin Protein 1β (HP1β) has distinct functions and distinct nuclear distribution in pluripotent versus differentiated cells
Source: PubMed Central journal article supplement (PMC4587738; doi:10.1186/s13059-015-0760-8), 2015-09-28

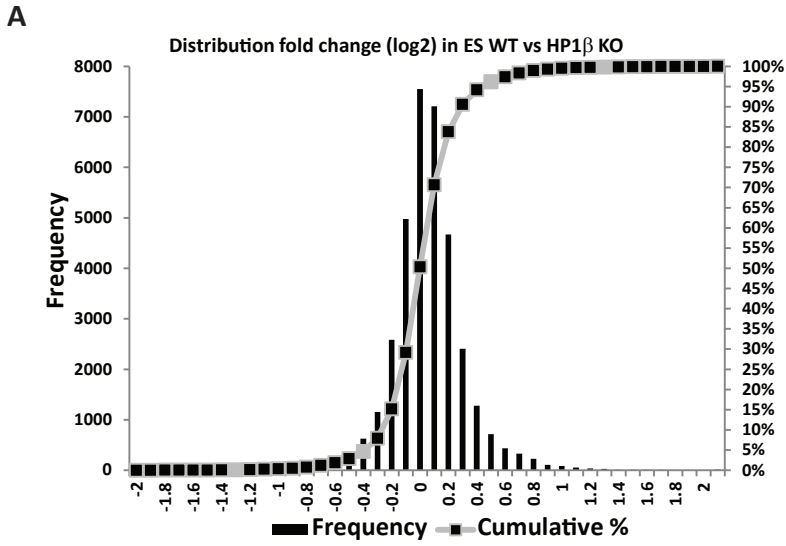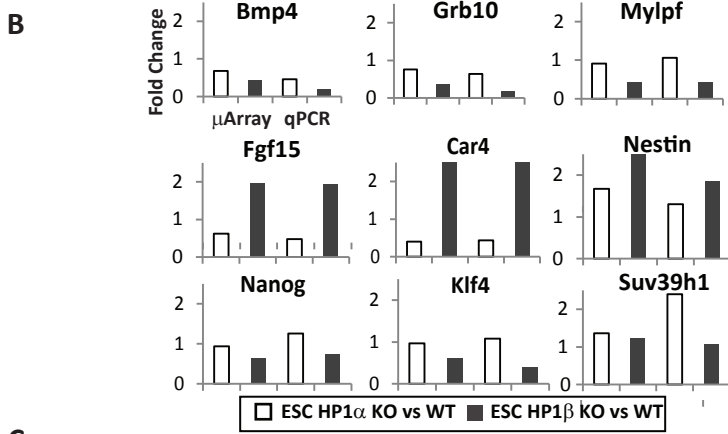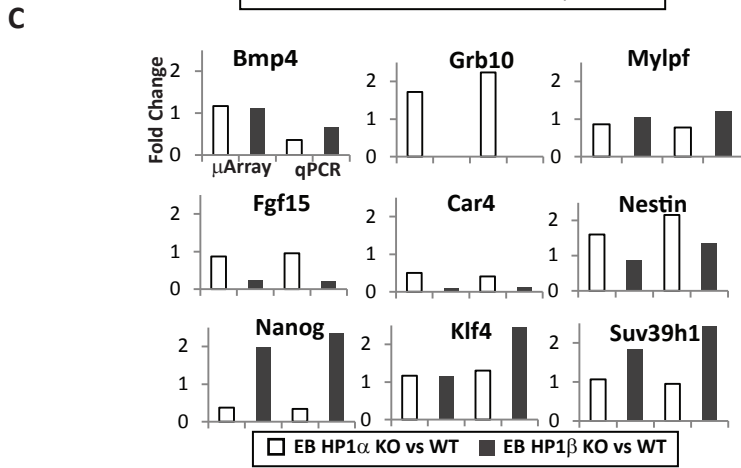

Supplement: 13059_2015_760_MOESM3_ESM.pdf [file 13059_2015_760_MOESM3_ESM.pdf]
